# Supplementary material for: Decoding the Heterogeneity of Malignant Gliomas by PET and MRI for Spatial Habitat Analysis of Hypoxia, Perfusion, and Diffusion Imaging: A Preliminary Study
Source: PubMed Central journal article supplement (PMC9326318; doi:10.3389/fnins.2022.885291), 2022-07-13
Supplement: Image_1.pdf [file Image_1.pdf]

*Supplementary Material*

**Supplementary Figure 1 - OTSU algorithm and cluster intersection.**

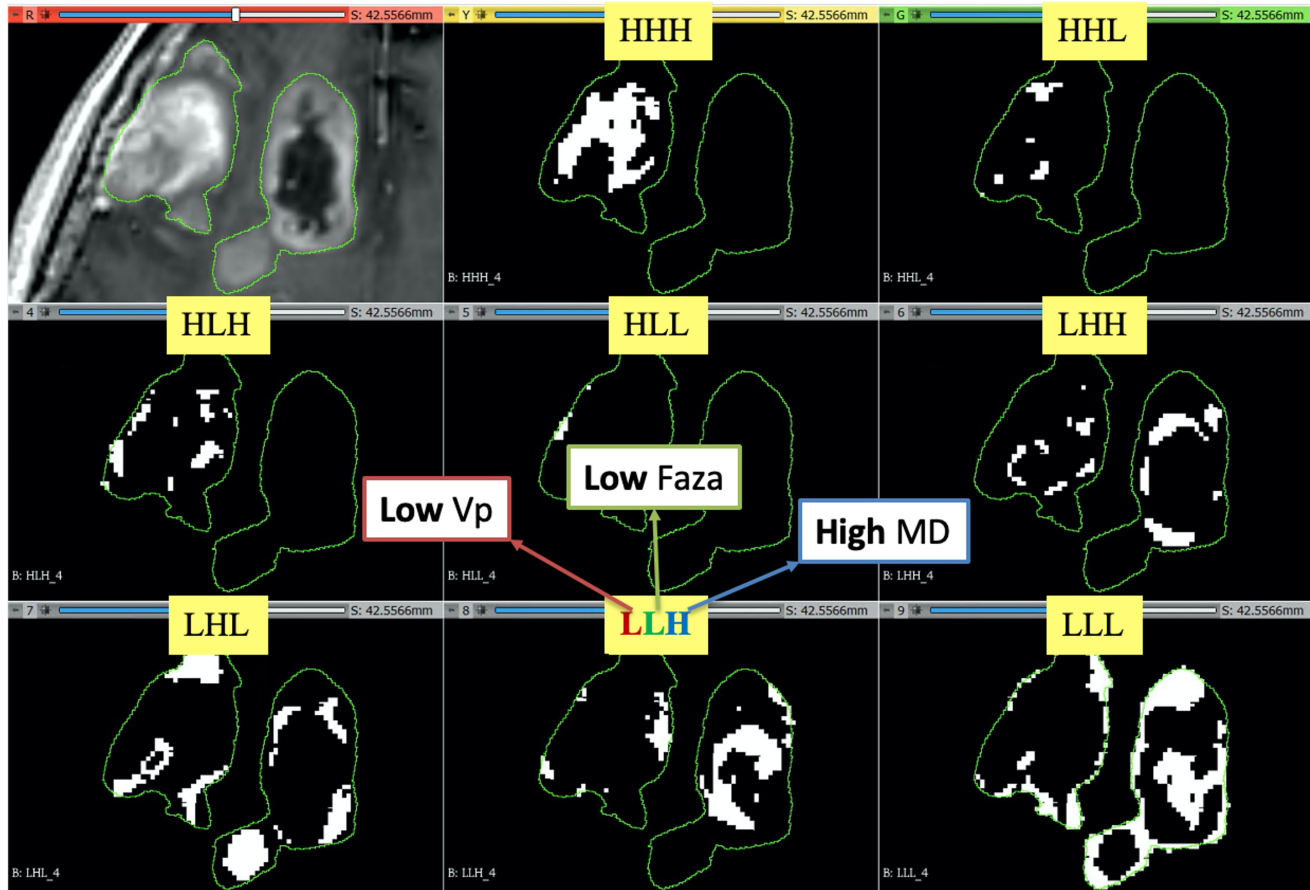

*The OTSU algorithm was adopted to identify the best cut-off able to divide voxels in two cluster of intensity while preserving the highest possible amount of information. Each tumor-masked parametric map then underwent an automatic OTSU binary clustering in 2 disjointed regions by grouping together voxels with HIGH and LOW intensity values. The 8 combinations (cluster intersection) were then generated by combining all possible high (H) and low (L) region of each map (e.g., Vp + FAZA + MD) obtained from the OTSU algorithm.*
