# Supplementary material for: Decoding the Heterogeneity of Malignant Gliomas by PET and MRI for Spatial Habitat Analysis of Hypoxia, Perfusion, and Diffusion Imaging: A Preliminary Study
Source: PubMed Central journal article supplement (PMC9326318; doi:10.3389/fnins.2022.885291), 2022-07-13
Supplement: Table_1.pdf [file Table_1.pdf]

## *Supplementary Material*

**Supplementary Table 1 - Characteristics of the sequences acquired on the 1.5T MR scanner.**

|          | Scanning sequence and options                                    | TR (ms) | TE (ms) | FOV (mm) | Acquisition matrix (mm) | Slice thickness (mm) | Reconstructed voxel (mm) | Acquisition time (seconds) |
|----------|------------------------------------------------------------------|---------|---------|----------|-------------------------|----------------------|--------------------------|----------------------------|
| 3D T1 CE | Axial 3D spoiled gradient echo T1 weighted                       | 25      | 5       | 256      | 256x256                 | 1                    | 1x1x1                    | 512                        |
| 3D FLAIR | Axial 3D FLAIR (TI = 1700)                                       | 4800    | 320     | 240      | 240x240                 | 1                    | 1x1x1                    | 240                        |
| DTI      | GE-EPI, b-values of 0 and 1000 s/mm <sup>2</sup> , 15 directions | 3733    | 99      | 224      | 92x90                   | 2.5                  | 1.75x1.75x2.5            | 694                        |
| DCE      | Axial DCE 3D spoiled gradient echo T1 weighted, 70 dynamics      | 4       | 1.9     | 230      | 96x96                   | 5                    | 2.05x2.05x2.5            | 466                        |
| DSC      | Axial DSC FFE-EPI T2* weighted, 80 dynamics                      | 1650    | 40      | 230      | 76x61                   | 5                    | 2.05x2.05x5              | 137                        |

*The scanner was a Philips Achieva (Philips Healthcare, Best, Netherlands). GE = gradient eco, EPI = Echo Planar Imaging, IR = inversion recovery, SE = Spin Echo, CE = contrast-enhanced, TI = Time of inversion.*

**Supplementary Table 2 - Characteristics of the sequences acquired on the 3T MR scanner.**

|          | Scanning sequence and options                                    | TR (ms) | TE (ms) | FOV (mm) | Acquisition matrix (mm) | Slice thickness (mm) | Reconstructed voxel (mm) | Acquisition time (seconds) |
|----------|------------------------------------------------------------------|---------|---------|----------|-------------------------|----------------------|--------------------------|----------------------------|
| 3D T1 CE | Axial 3D spoiled gradient echo T1 weighted                       | 11      | 5       | 256      | 284x190                 | 0.9                  | 0.8x0.8x0.9              | 321                        |
| 3D FLAIR | Axial 3D FLAIR (TI = 1700)                                       | 9000    | 300     | 230      | 204x204                 | 1.2                  | 0.7x0.7x0.7              | 486                        |
| DTI      | GE-EPI, b-values of 0 and 1000 s/mm <sup>2</sup> , 32 directions | 3200    | 80      | 240      | 96x94                   | 2.5                  | 0.94x0.94x2.5            | 215                        |
| DCE      | Axial DCE 3D spoiled gradient echo T1 weighted, 70 dynamics      | 4       | 1.8     | 230      | 96x96                   | 5                    | 2.05x2.05x2.5            | 382                        |
| DSC      | Axial DSC FFE-EPI T2* weighted, 80 dynamics                      | 1500    | 40      | 230      | 96x78                   | 5                    | 2.05x2.05x5              | 124                        |

*The scanner was an Ingenia CX (Philips Healthcare, Best, Netherlands). GE = gradient eco, EPI = Echo Planar Imaging, IR = inversion recovery, SE = Spin Echo, CE = contrast-enhanced, TI = Inversion Time*
